# Supplementary material for: Serum cotinine as a predictor of lipid-related indices in Turkish immigrants with type 2 diabetes: A clinic-based cross-sectional study
Source: PubMed Central journal article supplement (PMC9978330; doi:10.3389/fmed.2023.1011045), 2023-02-16

Supplementary Figure 1. Study enrolment flow chart.

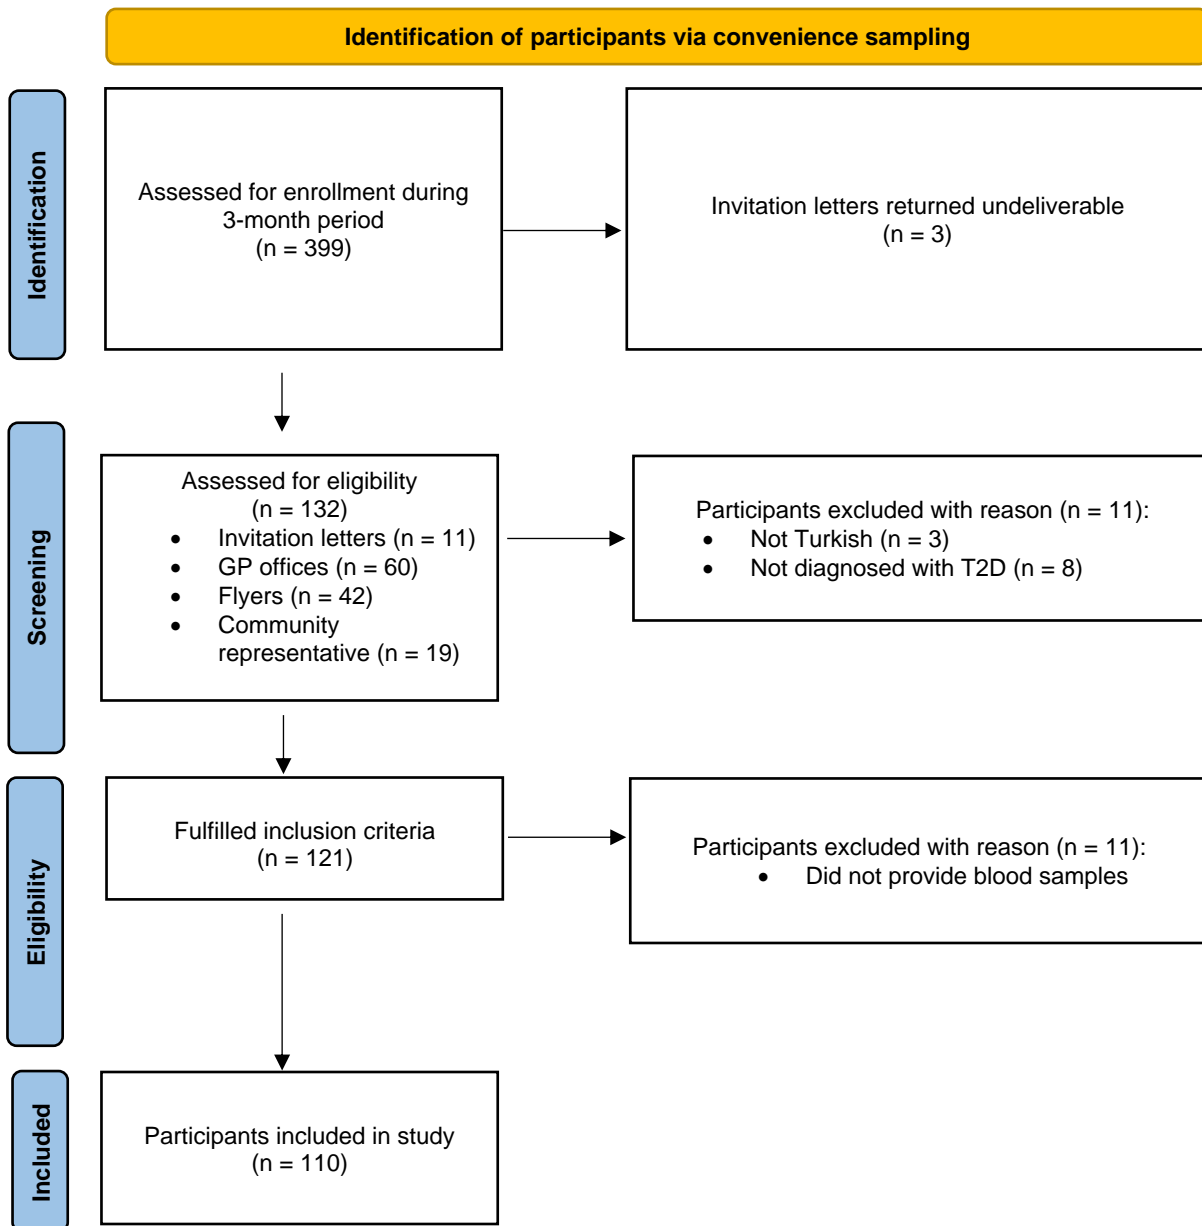

Supplement: Image_1.pdf [file Image_1.pdf]
